# Supplementary material
Source: ML conference proceedings conference paper supplement (https://proceedings.mlr.press/v139/guo21a.html)
Supplement: Supplementary file 1 [file guo21a-supp.zip › supp.pdf]

## A. Proofs of propositions and lemmas

In this section, we give the proofs of propositions and lemmas in §4. To simplify the notation, we write  $\text{KL}(\pi^1 \parallel \pi^2) = \text{KL}(\pi^1(\cdot | s) \parallel \pi^2(\cdot | s))$ , where  $\text{KL}$  computes the Kullback–Leibler divergence.

### A.1. Proof of Lemma 3.1

The maximization problem that we are supposed to solve is formulated as

$$\max_{\pi^1} \mathbb{E}_{\nu_k} \left[ \langle \widehat{Q}^{\pi^1_k}(s, \cdot), \pi^1(\cdot | s) \rangle - \beta \cdot \text{KL}(\pi^1(\cdot | s) \parallel \pi_k^1(\cdot | s)) \right] \quad (\text{A.1})$$

$$\text{subject to } \sum_{a^1 \in \mathcal{A}^1} \pi^1(a^1 | s) = 1, \quad \forall s \in \mathcal{S}. \quad (\text{A.2})$$

The Lagrangian of the above problem is given by

$$\int_{s \in \mathcal{S}} \left( \langle \widehat{Q}^{\pi^1_k}(s, \cdot), \pi^1(\cdot | s) \rangle - \beta \cdot \text{KL}(\pi^1(\cdot | s) \parallel \pi_k^1(\cdot | s)) \right) d\nu_k + \int_{s \in \mathcal{S}} \left( \sum_{a^1 \in \mathcal{A}^1} \pi^1(a^1 | s) - 1 \right) d\lambda(s), \quad (\text{A.3})$$

where  $\lambda(\cdot)$  is the introduced dual parameter. Plugging in (3.1), we obtain the following optimality condition,

$$\pi^1(a^1 | s) = \frac{\exp \{ \beta^{-1} \cdot Q_k^1(s, a^1) + \tau_k^{-1} \cdot \phi^1(s, a^1)^\top \theta_k^1 \}}{\exp \{ 1 + \sum_{a'^1 \in \mathcal{A}^1} \exp(\tau_k^{-1} \cdot \phi^1(s, a'^1)^\top \theta_k^1) + \beta^{-1} \cdot \frac{d\lambda(s)}{d\nu_k(s)} \}} \quad (\text{A.4})$$

Hence, we have  $\pi^1(a^1 | s) \propto \exp \{ \beta^{-1} \cdot Q_k^1(s, a^1) + \tau_k^{-1} \cdot \phi^1(s, a^1)^\top \theta_k^1 \}$ . By plugging in the definition of  $Q_k^1$  in (3.3), it follows that

$$\theta_{k+1}^1 = \tau_{k+1}^{-1} \cdot (\beta^{-1} \omega_k^1 + \tau_k^{-1} \theta_k^1), \quad (\text{A.5})$$

which concludes the proof of Lemma 3.1.

### A.2. Proof of Proposition 4.4

*Proof.* Let

$$\widehat{\Phi} = \left( \frac{1}{N} \sum_{i=1}^N \phi^1(s_{i,0}, a_{i,0}^1) \phi^1(s_{i,0}, a_{i,0}^1)^\top \right)^{-1}, \quad (\text{A.6})$$

$$\Phi = \left( \mathbb{E}_{\rho_{k+1}} [\phi^1(s, a^1) \phi^1(s, a^1)^\top] \right)^{-1}, \quad (\text{A.7})$$

$$\widehat{v} = \frac{1}{N} \sum_{i=1}^N ((1 - \gamma) \cdot r_{i,1}^1 + \gamma \cdot \widehat{Q}^{\pi_k^1}(s_{i,2}, a_{i,2}^1)) \cdot \phi^1(s_{i,1}, a_{i,1}^1), \quad (\text{A.8})$$

$$v = \mathbb{E}_{\rho_{k+1}} [\mathbb{T}^{\pi_{k+1}^1, \pi_{k+1}^2} \widehat{Q}^{\pi_k^1}(s, a^1, a^2) \cdot \phi^1(s, a^1)]. \quad (\text{A.9})$$

Then, we can write

$$\begin{aligned} \mathbb{T}^{\pi_{k+1}^1, \pi_{k+1}^2} \widehat{Q}^{\pi_k^1} &= \phi^1(s, a^1)^\top \widetilde{\omega}_{k+1} = \phi^1(s, a^1)^\top (\Phi v), \\ \widehat{Q}^{\pi_{k+1}^1} &= \phi^1(s, a^1)^\top \omega_{k+1} = \phi^1(s, a^1)^\top \Pi_R(\widehat{\Phi} \widehat{v}). \end{aligned}$$

Here, recall that  $\widetilde{\omega}_{k+1}$  is the solution to the critic update problem in (3.8). The closed form of  $\widetilde{\omega}_{k+1}$  is given in (3.7). By Assumption 4.2, it holds that  $\Phi v = \Pi_R(\Phi v)$ . Then, we have

$$\begin{aligned} & |\mathbb{T}^{\pi_{k+1}^1, \pi_{k+1}^2} \widehat{Q}^{\pi_k^1} - \widehat{Q}^{\pi_{k+1}^1}| \\ &= |\phi^1(s, a^1)^\top \Pi_R(\Phi v - \widehat{\Phi} \widehat{v})| \\ &\leq \|\phi^1(s, a^1)\|_2 \cdot \|\Pi_R(\Phi v - \widehat{\Phi} \widehat{v})\|_2 \\ &\leq \|\Phi v - \widehat{\Phi} \widehat{v}\|_2 \\ &\leq \|\Phi - \widehat{\Phi}\|_2 \cdot \|v\|_2 + \|\widehat{\Phi}\|_2 \cdot \|\widehat{v} - v\|_2, \end{aligned}$$

where the second inequality follows from the fact that  $\|\phi^1\|_2 \leq 1$  uniformly, and  $\Pi_R$  is a contraction, and the last inequality follows from the triangle inequality. Since  $|r^1| \leq r_{\max}$ ,  $\|\omega\|_2 \leq R$ , and  $\|\phi^1\|_2 \leq 1$ , it follows that  $\|v\|_2 \leq r_{\max} + R$ . The following lemmas provide upper bound for  $\|\hat{v} - v\|$  and high-probability upper bounds for  $\|\Phi - \hat{\Phi}\|$  and  $\|\hat{\Phi}\|_2$ .

**Lemma A.1.** For  $\hat{v}$  and  $v$  defined in (A.8) and (A.9), it holds with probability at least  $1 - \delta$  that

$$\|\hat{v} - v\|_2 \leq \frac{4(r_{\max} + R)}{\sqrt{N}} \log\left(\frac{2d}{\delta}\right),$$

where the uncertainty comes from  $\hat{v}$ .

*Proof.* See §B.2 for a detailed proof. □

**Lemma A.2.** For  $\Phi$  and  $\hat{\Phi}$  defined in (A.7) and (A.6), it holds with probability at least  $1 - \delta$  that

$$\|\hat{\Phi} - \Phi\|_2 \leq \frac{1}{(\sqrt{N}\lambda_*/4) \cdot \log^{-1}(2d/\delta) - 1}, \text{ and } \|\hat{\Phi}\|_2 \leq \frac{\sqrt{N}}{\sqrt{N}\lambda_* - 4 \log(2d/\delta)},$$

where the uncertainty comes from  $\hat{\Phi}$ .

*Proof.* See §B.3 for a detailed proof. □

Then, it holds with probability at least  $1 - 2\delta$  that

$$\begin{aligned} & \mathbb{E}_\rho \left[ \left| \mathbb{T}^{\pi_{k+1}^1, \tilde{\pi}_{k+1}^2} \hat{Q}^{\pi_k^1} - \hat{Q}^{\pi_{k+1}^1} \right| \right] \\ & \leq \mathbb{E}_\rho \left[ \|\Phi - \hat{\Phi}\|_2 \cdot \|v\|_2 + \|\hat{\Phi}\|_2 \cdot \|\hat{v} - v\|_2 \right] \\ & \leq \frac{r_{\max} + R}{(\sqrt{N}\lambda_*/4) \cdot \log^{-1}(2d/\delta) - 1} + \frac{4(r_{\max} + R) \log(2d/\delta)}{\sqrt{N}\lambda_* - 4 \log(2d/\delta)} \\ & \leq \frac{2(r_{\max} + R)}{(\sqrt{N}\lambda_*/4) \cdot \log^{-1}(2d/\delta) - 1} \\ & \leq \frac{16(r_{\max} + R)}{\sqrt{N}\lambda_*} \cdot \log\left(\frac{2d}{\delta}\right). \end{aligned}$$

Here, the expectation  $\mathbb{E}$  is taken with respect to  $(s, a^1, a^2) \sim \rho$ , the uncertainty comes from  $\hat{\Phi}$  and  $\hat{v}$ , and the last inequality holds whenever  $\sqrt{N}\lambda_*/(4 \log(2d/\delta)) \geq 2$ , which is satisfied by our choice of  $N$ . Thus, we conclude the proof of Proposition 4.4. □

### A.3. Proof of Lemma 5.1

*Proof.* We first give the following lemma which holds for  $\pi_{k+1}^1, \pi_k^1$  and  $\hat{Q}^{\pi_k^1}$  that comes from Algorithm 3.

**Lemma A.3.** Let  $\pi_k^1, \pi_{k+1}^1$ , and  $\hat{Q}^{\pi_k^1}$  be given by Algorithm 3, and  $\pi^1$  be any policy of player 1. Then we have

$$\langle \log(\pi_{k+1}^1/\pi_k^1), \pi^1 - \pi_k^1 \rangle = \beta^{-1} \cdot \langle \hat{Q}^{\pi_k^1}, \pi^1 - \pi_k^1 \rangle.$$

*Proof.* See §B.1 for a detailed proof. □

Then, it holds that

$$\begin{aligned}
 f_k &= [\gamma(\mathbb{P}_*^{\pi_k^1} - \mathbb{P}_*^{\pi_{k+1}^1})\widehat{Q}^{\pi_k^1}] \\
 &= [\gamma\mathbb{P}\langle \widehat{Q}^{\pi_k^1}, \pi_*^1 - \pi_{k+1}^1 \rangle] \\
 &= \gamma\beta[\mathbb{P}\langle \log(\pi_{k+1}^1/\pi_k^1), \pi_*^1 - \pi_{k+1}^1 \rangle] \\
 &= \gamma\beta[\mathbb{P}\langle \log(\pi_{k+1}^1/\pi_*^1) + \log(\pi_*^1/\pi_k^1), \pi_*^1 \rangle - \mathbb{P}\langle \log(\pi_{k+1}^1/\pi_*^1), \pi_k^1 \rangle] \\
 &= \gamma\beta[\mathbb{P}(\text{KL}(\pi_*^1 \parallel \pi_k^1) - \text{KL}(\pi_*^1 \parallel \pi_{k+1}^1) - \text{KL}(\pi_{k+1}^1 \parallel \pi_k^1))] \\
 &\leq \gamma\beta[\mathbb{P}(\text{KL}(\pi_*^1 \parallel \pi_k^1) - \text{KL}(\pi_*^1 \parallel \pi_{k+1}^1))],
 \end{aligned}$$

where the third equality follows from Lemma A.3. Upon telescoping with respect to  $k$ , it holds that

$$\begin{aligned}
 \sum_{k=0}^K f_k &\leq \sum_{k=0}^K \beta \cdot [\mathbb{P}(\text{KL}(\pi_*^1 \parallel \pi_k^1) - \text{KL}(\pi_*^1 \parallel \pi_{k+1}^1))] \\
 &= \beta \cdot [\mathbb{P}(\text{KL}(\pi_*^1 \parallel \pi_0^1) - \text{KL}(\pi_*^1 \parallel \pi_{K+1}^1))] \\
 &\leq \beta \cdot [\mathbb{P}\text{KL}(\pi_*^1 \parallel \pi_0^1)].
 \end{aligned} \tag{A.10}$$

By the initialization of policies in (3.2),  $\pi_0^1$  is a uniform policy. Thus, it holds for any state  $s \in \mathcal{S}$  that

$$\text{KL}(\pi_*^1 \parallel \pi_0^1) = \sum_{a^1 \in \mathcal{A}^1} \pi_*^1(a^1 | s) \log \frac{\pi_*^1(a^1 | s)}{\pi_0^1(a^1 | s)} = \sum_{a^1 \in \mathcal{A}^1} \pi_*^1(a^1 | s) \log \frac{\pi_*^1(a^1 | s)}{1/|\mathcal{A}^1|} = \log(|\mathcal{A}^1|) - \mathcal{H}(\pi_*^1). \tag{A.11}$$

Here,  $\mathcal{H}(\pi_*^1)$  is the Shannon entropy of  $\pi_*^1$ , and thus is always positive. Then, we obtain that

$$\sum_{k=0}^K f_k \leq \beta \log(|\mathcal{A}^1|),$$

which concludes the proof of Lemma 5.1.  $\square$

#### A.4. Proof of Lemma 5.2

*Proof.* It holds that

$$\begin{aligned}
 h_k &= \mathbb{T}^{\pi_{k+1}^1, \tilde{\pi}_{k+1}^2} \widehat{Q}^{\pi_k^1} - Q^{\pi_{k+1}^1, \tilde{\pi}_{k+1}^2} \\
 &= (1 - \gamma) \cdot r + \gamma \mathbb{P}^{\pi_{k+1}^1, \tilde{\pi}_{k+1}^2} \widehat{Q}^{\pi_k^1} - Q^{\pi_{k+1}^1, \tilde{\pi}_{k+1}^2} \\
 &= (1 - \gamma) \cdot r + \sum_{t=1}^{\infty} [(\gamma \mathbb{P}^{\pi_{k+1}^1, \tilde{\pi}_{k+1}^2})^t - (\gamma \mathbb{P}^{\pi_{k+1}^1, \tilde{\pi}_{k+1}^2})^{t+1}] \widehat{Q}^{\pi_k^1} - \sum_{t=0}^{\infty} (1 - \gamma)(\gamma \mathbb{P}^{\pi_{k+1}^1, \tilde{\pi}_{k+1}^2})^t r \\
 &= \sum_{t=1}^{\infty} (\gamma \mathbb{P}^{\pi_{k+1}^1, \tilde{\pi}_{k+1}^2})^t (\widehat{Q}^{\pi_k^1} - \gamma \mathbb{P}^{\pi_{k+1}^1, \tilde{\pi}_{k+1}^2} \widehat{Q}^{\pi_k^1} - (1 - \gamma)r) \\
 &= \sum_{t=1}^{\infty} (\gamma \mathbb{P}^{\pi_{k+1}^1, \tilde{\pi}_{k+1}^2})^t \underbrace{(\widehat{Q}^{\pi_k^1} - \mathbb{T}^{\pi_{k+1}^1, \tilde{\pi}_{k+1}^2} \widehat{Q}^{\pi_k^1})}_{\triangleq e_k}.
 \end{aligned} \tag{A.12}$$

Here, the second equality follows from the definition of  $Q^{\pi^1, \pi^2}$  in (2.1), and we define

$$\begin{aligned}
 e_k &= \widehat{Q}^{\pi_k^1} - \mathbb{T}^{\pi_{k+1}^1, \tilde{\pi}_{k+1}^2} \widehat{Q}^{\pi_k^1} \\
 &= \widehat{Q}^{\pi_k^1} - \mathbb{T}^{\pi_k^1, \tilde{\pi}_k^2} \widehat{Q}^{\pi_k^1} + \gamma(\mathbb{P}^{\pi_k^1, \tilde{\pi}_k^2} - \mathbb{P}^{\pi_{k+1}^1, \tilde{\pi}_{k+1}^2}) \widehat{Q}^{\pi_k^1} \\
 &= \widehat{Q}^{\pi_k^1} - \mathbb{T}^{\pi_k^1, \tilde{\pi}_k^2} \widehat{Q}^{\pi_k^1} + \gamma(\mathbb{P}^{\pi_k^1} - \mathbb{P}^{\pi_k^2}) \widehat{Q}^{\pi_k^1}
 \end{aligned} \tag{A.13}$$

Since

$$\begin{aligned}
 (\mathbb{P}^{\pi_k^1} - \mathbb{P}^{\pi_k^2})\widehat{Q}^{\pi_k^1} &= \mathbb{P}[\langle \pi_k^1 - \pi_{k+1}^1, \widehat{Q}^{\pi_k^1} \rangle] \\
 &= \beta \cdot \mathbb{P}[\langle \log(\pi_{k+1}^1/\pi_k^1), \pi_k^1 - \pi_{k+1}^1 \rangle] \\
 &= \beta \cdot \mathbb{P}[-\text{KL}(\pi_k^1 \parallel \pi_{k+1}^1) - \text{KL}(\pi_{k+1}^1 \parallel \pi_k^1)] \\
 &\leq 0,
 \end{aligned}$$

where the second equality follows from Lemma A.3. We then have

$$e_k = \widehat{Q}^{\pi_k^1} - \mathbb{T}^{\pi_{k+1}^1, \tilde{\pi}_{k+1}^2} \widehat{Q}^{\pi_k^1} \leq \widehat{Q}^{\pi_k^1} - \mathbb{T}^{\pi_k^1, \tilde{\pi}_k^2} \widehat{Q}^{\pi_k^1}.$$

Then, it holds that

$$\begin{aligned}
 e_{k+1} &\leq \widehat{Q}^{\pi_{k+1}^1} - \mathbb{T}^{\pi_{k+1}^1, \tilde{\pi}_{k+1}^2} \widehat{Q}^{\pi_{k+1}^1} \\
 &= \underbrace{\widehat{Q}^{\pi_{k+1}^1} - \mathbb{T}^{\pi_{k+1}^1, \tilde{\pi}_{k+1}^2} \widehat{Q}^{\pi_k^1}}_{=-\epsilon_k} + \underbrace{\mathbb{T}^{\pi_{k+1}^1, \tilde{\pi}_{k+1}^2} \widehat{Q}^{\pi_k^1} - (\mathbb{T}^{\pi_{k+1}^1, \tilde{\pi}_{k+1}^2})^2 \widehat{Q}^{\pi_k^1}}_{=\gamma \mathbb{P}^{\pi_{k+1}^1, \tilde{\pi}_{k+1}^2} e_k} \\
 &\quad + \underbrace{(\mathbb{T}^{\pi_{k+1}^1, \tilde{\pi}_{k+1}^2})^2 \widehat{Q}^{\pi_k^1} - \mathbb{T}^{\pi_{k+1}^1, \tilde{\pi}_{k+1}^2} \widehat{Q}^{\pi_{k+1}^1}}_{=\gamma \mathbb{P}^{\pi_{k+1}^1, \tilde{\pi}_{k+1}^2} \epsilon_k} \\
 &= \gamma \mathbb{P}^{\pi_{k+1}^1, \tilde{\pi}_{k+1}^2} e_k - (I - \gamma \mathbb{P}^{\pi_{k+1}^1, \tilde{\pi}_{k+1}^2}) \epsilon_k.
 \end{aligned} \tag{A.14}$$

By applying (A.14)  $k$  times, we obtain that

$$e_k \leq \gamma^k \left( \prod_{i=1}^k \mathbb{P}^{\pi_i^1, \pi_i^2} \right) e_0 - \sum_{i=0}^{k-1} \gamma^i \left( \prod_{j=k-i+1}^k \mathbb{P}^{\pi_j^1, \pi_j^2} \right) (I - \gamma \mathbb{P}^{\pi_{k-i}^1, \tilde{\pi}_{k-i}^2}) \epsilon_{k-i-1}. \tag{A.15}$$

Plugging (A.15) into (A.12), we obtain that

$$h_k \leq \sum_{t=1}^{\infty} (\gamma \mathbb{P}^{\pi_{k+1}^1, \tilde{\pi}_{k+1}^2})^t \left( \gamma^k \left( \prod_{i=1}^k \mathbb{P}^{\pi_i^1, \pi_i^2} \right) e_0 - \sum_{i=0}^{k-1} \gamma^i \left( \prod_{j=k-i+1}^k \mathbb{P}^{\pi_j^1, \pi_j^2} \right) (I - \gamma \mathbb{P}^{\pi_{k-i}^1, \tilde{\pi}_{k-i}^2}) \epsilon_{k-i-1} \right). \tag{A.16}$$

Since  $|r^1| \leq r_{\max}$ ,  $\|\omega\|_2 \leq R$ , and  $\|\phi\|_2 \leq 1$ , it holds that

$$|e_0| = |\widehat{Q}^{\pi_0^1} - \mathbb{T}^{\pi_1^1, \pi_1^2} \widehat{Q}^{\pi_0^1}| = |\widehat{Q}^{\pi_0^1} - (1 - \gamma)r - \gamma \mathbb{P}^{\pi_1^1, \pi_1^2} \widehat{Q}^{\pi_0^1}| \leq r_{\max} + R.$$

Upon telescoping with respect to  $k$  and taking expectation with respect to  $\rho$ , it holds that

$$\mathbb{E}_{\rho} \left[ \sum_{k=0}^K \sum_{t=1}^{\infty} (\gamma \mathbb{P}^{\pi_{k+1}^1, \tilde{\pi}_{k+1}^2})^t \gamma^k \left( \prod_{i=1}^k \mathbb{P}^{\pi_i^1, \pi_i^2} \right) e_0 \right] \leq \sum_{k=0}^K \sum_{t=1}^{\infty} \gamma^{k+t} (r_{\max} + R) \leq \frac{r_{\max} + R}{(1 - \gamma)^2}, \tag{A.17}$$

and

$$\begin{aligned}
 & \mathbb{E}_\rho \left[ \sum_{k=0}^K \sum_{t=1}^{\infty} \sum_{i=0}^{k-1} (\gamma \mathbb{P}^{\pi_{k+1}^1, \tilde{\pi}_{k+1}^2})^t \gamma^i \left( \prod_{j=k+1-i}^k \mathbb{P}^{\pi_j^1, \pi_j^2} \right) (I - \gamma \mathbb{P}^{\pi_{k-i}^1, \tilde{\pi}_{k-i}^2}) \epsilon_{k-i-1} \right] \\
 & \leq \sum_{k=1}^K \sum_{t=1}^{\infty} \sum_{i=0}^{k-1} \gamma^{t+i} \mathbb{E}_\rho \left[ (\mathbb{P}^{\pi_{k+1}^1, \tilde{\pi}_{k+1}^2})^t \left( \prod_{j=k+1-i}^k \mathbb{P}^{\pi_j^1, \pi_j^2} \right) |\epsilon_{k-i-1}| \right] \\
 & \leq \sum_{k=1}^K \sum_{t=1}^{\infty} \sum_{i=0}^{k-1} \gamma^{t+i} c(t+i) \mathbb{E}_\rho [|\epsilon_{k-i-1}|] \\
 & = \sum_{k=1}^K \sum_{t=1}^{\infty} \sum_{i=t}^{k+t-1} \gamma^i c(i) \mathbb{E}_\rho [|\epsilon_{k-i+t-1}|] \\
 & = \sum_{k=1}^K \sum_{i=1}^{\infty} \sum_{t=\max\{1, i-k+1\}}^i \gamma^i c(i) \epsilon_Q \\
 & \leq \sum_{k=1}^K \sum_{i=1}^{\infty} i \gamma^i c(i) \epsilon_Q \\
 & \leq \frac{K C_\rho \epsilon_Q}{(1-\gamma)^2}.
 \end{aligned} \tag{A.18}$$

Here, the second and the last inequality follows from Assumption 4.1, where  $c(\cdot)$  and  $C_\rho$  are defined, and the second equality follows from the definition of  $\epsilon_Q$  in (4.2). Combining (A.16), (A.17), and (A.18) together, we obtain that

$$\mathbb{E}_\rho \left[ \sum_{k=0}^K h_k \right] \leq \frac{r_{\max} + R + K C_\rho \epsilon_Q}{(1-\gamma)^2},$$

which concludes the proof of Lemma 5.2.  $\square$

## B. Proof of Auxiliary Lemmas

In this section, we give proofs of the lemmas in §A.

### B.1. Proof of Lemma A.3

*Proof.* Let  $\pi_k^1$ ,  $\pi_{k+1}^1$ , and  $\hat{Q}^{\pi_k^1}$  be generated by Algorithm 3. Then it follows that

$$\begin{aligned}
 \langle \log(\pi_{k+1}^1 / \pi_k^1), \pi^1 - \pi_k^1 \rangle &= \sum_{a \in \mathcal{A}^1} \left[ \log(\pi_{k+1}^1(s, a) / \pi_k^1(s, a)) \right] (\pi^1(a | s) - \pi_k^1(a | s)) \\
 &= \sum_{a \in \mathcal{A}^1} \left[ \log \left( \frac{\exp(\tau_{k+1}^{-1} \cdot \phi^1(s, a)^\top \theta_{k+1}^1)}{\exp(\tau_k^{-1} \cdot \phi^1(s, a)^\top \theta_k^1)} \right) \right] (\pi^1(a | s) - \pi_k^1(a | s)) \\
 &\quad - \underbrace{\sum_{a \in \mathcal{A}^1} \left[ \log \left( \frac{\sum_{a' \in \mathcal{A}^1} \exp(\tau_{k+1}^{-1} \cdot \phi^1(s, a')^\top \theta_{k+1}^1)}{\sum_{a' \in \mathcal{A}^1} \exp(\tau_k^{-1} \cdot \phi^1(s, a')^\top \theta_k^1)} \right) \right] (\pi^1(a | s) - \pi_k^1(a | s))}_{=0} \\
 &= \sum_{a \in \mathcal{A}^1} \left[ \log \left( \frac{\exp(\phi^1(s, a)^\top (\beta^{-1} \omega_k^1 + \tau_k^{-1} \theta_k^1))}{\exp(\tau_k^{-1} \cdot \phi^1(s, a)^\top \theta_k^1)} \right) \right] (\pi^1(a | s) - \pi_k^1(a | s)) \\
 &= \sum_{a \in \mathcal{A}^1} (\phi^1(s, a)^\top \omega_k^1) (\pi^1(a | s) - \pi_k^1(a | s)) \\
 &= \beta^{-1} \cdot \langle \hat{Q}^{\pi_k^1}, \pi^1 - \pi_k^1 \rangle,
 \end{aligned}$$

which concludes the proof of Lemma A.3.  $\square$

### B.2. Proof of Lemma A.1

*Proof.* We denote

$$\Lambda_i = \frac{1}{N} \left( ((1 - \gamma) \cdot r_{i,1}^1 + \gamma \cdot \widehat{Q}^{\pi_k^1}(s_{i,2}, a_{i,2}^1)) \cdot \phi^1(s_{i,1}, a_{i,1}^1) - \mathbb{E}_{\rho_{k+1}} [\mathbb{T}^{\pi_{k+1}^1, \pi_{k+1}^2} \widehat{Q}^{\pi_k^1}(s, a^1, a^2) \cdot \phi^1(s, a^1)] \right).$$

By the fact that  $(s_{i,1}, a_{i,1}^1, a_{i,1}^2) \sim \rho_{k+1}$ ,  $s_{i,2} \sim \mathcal{P}(\cdot | s, a_{i,1}^1, a_{i,1}^2)$ , and  $a_{i,2}^1 \sim \pi_{k+1}^1(\cdot | s_{i,2})$ , we have  $\mathbb{E}[\Lambda_i] = 0$ . Since  $|r^1| \leq r_{\max}$ ,  $\|\omega\| \leq R$ , and  $\|\phi^1\|_2 \leq 1$ , it holds that  $\|\Lambda_i\|_2 \leq 2(r_{\max} + R)/N$ . Also, the following matrix variance statistic of the sum  $\sum \Lambda_i$  is upper bounded,

$$V\left(\sum_{j=1}^N \Lambda_j\right) = \mathbb{E} \left[ \left\| \left( \sum_{j=1}^N \Lambda_j \right) \left( \sum_{j=1}^N \Lambda_j \right)^\top \right\|_2 \right] = \mathbb{E} \left[ \left\| \sum_{j=1}^N \Lambda_j \Lambda_j^\top \right\|_2 \right] \leq \frac{4(r_{\max} + R)^2}{N}.$$

Here, the second equality follows from  $\mathbb{E}[\Lambda_i] = 0$  and the fact that  $\Lambda_i, i = 1, 2, \dots, N$  are independent. Thus, following from the matrix Bernstein inequality, it holds with probability at least  $1 - \delta$  that

$$\|\widehat{v} - v\|_2 \leq \frac{4(r_{\max} + R)}{\sqrt{N}} \log\left(\frac{2d}{\delta}\right)$$

which concludes the proof of Lemma A.1.  $\square$

### B.3. Proof of Lemma A.2

*Proof.* We denote

$$\Delta_i = \frac{1}{N} \left( \phi^1(s_{i,0}, a_{i,0}^1) \phi^1(s_{i,0}, a_{i,0}^1)^\top - \mathbb{E}_{\rho_{k+1}} [\phi^1(s, a^1) \phi^1(s, a^1)^\top] \right).$$

By the fact that  $(s_{i,0}, a_{i,0}^1, a_{i,0}^2) \sim \rho_{k+1}$  and  $\|\phi^1\|_2 \leq 1$ , we have  $\mathbb{E}[\Delta_i] = 0$  and  $\|\Delta_i\|_2 \leq 2/N$ . Note that the following matrix variance statistic of the sum  $\sum \Delta_i$  is upper bounded,

$$V\left(\sum_{i=1}^N \Delta_i\right) = \mathbb{E} \left[ \left\| \left( \sum_{i=1}^N \Delta_i \right) \left( \sum_{i=1}^N \Delta_i \right)^\top \right\|_2 \right] = \mathbb{E} \left[ \left\| \sum_{i=1}^N \Delta_i \Delta_i^\top \right\|_2 \right] \leq \frac{4}{N},$$

Here, the expectation is taken with respect to  $(s_{i,0}, a_{i,0}^1, a_{i,0}^2) \sim \rho_{k+1}$  and the second equality follows from  $\mathbb{E}[\Delta_i] = 0$  and the fact that  $\Delta_i, i = 1, 2, \dots, N$  are independent. Following from the matrix Bernstein inequality, it holds with probability at least  $1 - \delta$  that

$$\|\widehat{\Phi}^{-1} - \Phi^{-1}\|_2 \leq \frac{2}{3N} \log\left(\frac{2d}{\delta}\right) + \sqrt{\left(\frac{2}{3N} \log\left(\frac{2d}{\delta}\right)\right)^2 + \frac{8}{N} \log\left(\frac{2d}{\delta}\right)} \leq \frac{4}{\sqrt{N}} \log\left(\frac{2d}{\delta}\right),$$

where  $\widehat{\Phi}$  and  $\Phi$  are defined in (A.6) and (A.7), respectively. Following from Assumption 4.3, it holds that  $\|\Phi^{-1}\|_2 \geq \lambda_*$ . Thus, we have  $\|\Phi\|_2 \leq 1/\lambda_*$ . In what follows, we upper bound  $\|\widehat{\Phi}\|_2$ , which is the last part of upper bounding  $\|\widehat{\Phi} - \Phi\|_2$ . It holds that

$$\|\widehat{\Phi}\|_2 = \|(\Phi^{-1} + \widehat{\Phi}^{-1} - \Phi^{-1})^{-1}\|_2 \leq \|\Phi\|_2 + \|\Phi\|_2 \cdot \|\widehat{\Phi}^{-1} - \Phi^{-1}\|_2 \cdot \|\widehat{\Phi}\|_2.$$

Here, the first inequality follows from the fact that  $(A + B)^{-1} = A^{-1} - A^{-1}B(A + B)^{-1}$  for non-singular matrices  $A$  and  $A + B$  (Henderson & Searle, 1981), and the triangle inequality. Thus, it follows that

$$\|\widehat{\Phi}\|_2 \leq \frac{\|\Phi\|_2}{1 - \|\Phi\|_2 \cdot \|\widehat{\Phi}^{-1} - \Phi^{-1}\|_2}.$$

Then, we obtain that

$$\begin{aligned}
 \|\hat{\Phi} - \Phi\|_2 &= \|\hat{\Phi}\Phi^{-1}\Phi - \hat{\Phi}\hat{\Phi}^{-1}\Phi\|_2 \\
 &= \|\hat{\Phi}(\Phi^{-1} - \hat{\Phi}^{-1})\Phi\|_2 \\
 &\leq \|\hat{\Phi}\|_2 \cdot \|\hat{\Phi}^{-1} - \Phi^{-1}\|_2 \cdot \|\Phi\|_2 \\
 &\leq \frac{\|\Phi\|_2^2}{\|\hat{\Phi}^{-1} - \Phi^{-1}\|_2^{-1} - \|\Phi\|_2}.
 \end{aligned}$$

Hence, it holds with probability at least  $1 - \delta$  that

$$\|\hat{\Phi} - \Phi\|_2 \leq \frac{1/\lambda_*}{(\sqrt{N}/4) \cdot \log^{-1}(2d/\delta) - 1/\lambda_*} = \frac{1}{(\sqrt{N}\lambda_*/4) \cdot \log^{-1}(2d/\delta) - 1},$$

and

$$\|\hat{\Phi}\|_2 \leq \frac{\sqrt{N}}{\sqrt{N}\lambda_* - 4\log(2d/\delta)},$$

which concludes the proof of Lemam [A.2](#). □
